# Supplementary material for: Patients’ and Caregivers’ Conceptualisations of Pressure Ulcers and the Process of Decision-Making in the Context of Home Care
Source: MDPI journal article supplement (doi:10.3390/ijerph16152719), 2019-07-30
Supplement: s1 [file s1]

Supplementary Table S1

Memo

Personal motivation: When positive feelings associated with the implication in shared decision making, such a wellbeing, peace of mind, feelings of productivity and willingness to participate in the drafting of clinical practice guidelines appear in the participant`s speeches.

Facilitators for the process of shared decision-making in the home care of pressure ulcers

| Codes                                     | Categories                                                           | Subcategories                                                              |
|-------------------------------------------|----------------------------------------------------------------------|----------------------------------------------------------------------------|
| Involvement of primary care professionals | Closeness                                                            |                                                                            |
|                                           | Trust                                                                |                                                                            |
|                                           | The attitude of professionals                                        | Effective communication                                                    |
|                                           |                                                                      | The need to be listened to                                                 |
| Personal motivation                       | Positive feelings associated with the implication in decision making | Wellbeing                                                                  |
|                                           |                                                                      | Peace of mind                                                              |
|                                           |                                                                      | Feelings of productivity                                                   |
|                                           |                                                                      | Willingness to participate in the drafting of clinical practice guidelines |
